# Supplementary material for: Variation in offspring sex ratio among individual Weddell seal (Leptonychotes weddellii) females of different quality
Source: Springer Nature journal article supplement (doi:10.1007/s00265-008-0596-2), 2008-06-04
Supplement: MOESM4 [file 265_2008_596_MOESM4_ESM.doc]

S4. Model-averaged coefficient estimates (), standard error (), and 95% confidence interval (CI) of each fixed covariate explaining variation in offspring sex. Predictor weights (w+(j)) are presented from the overall modeling exercise.

| **Covariate** |  |  | **95% CI** | **w+(j)** |
| --- | --- | --- | --- | --- |
| iLRO | 0.0365 | 0.0184 | [0.0004, 0.0725] | 0.74 |
| AGE | 0.0050 | 0.0138 | [-0.0220, 0.0319] | 0.21 |
| PARITY | 0.0059 | 0.0207 | [-0.0347, 0.0464] | 0.15 |
| SumExtent | -0.0051 | -0.0051 | [-0.0151, 0.0049] | 0.13 |
| WinExtent | -0.0053 | 0.0160 | [-0.0366, 0.0260] | 0.14 |
| SOI | -0.0013 | 0.0051 | [-0.0113, 0.0086] | 0.11 |
